1 Title

2 **Dormancy dynamics and dispersal contribute to soil microbiome resilience**

3

4 Authors

5 Jackson W Sorensen<sup>a</sup> and Ashley Shade<sup>a,b,c</sup>

6

7

8

9 <sup>a</sup>Department of Microbiology and Molecular Genetics, Michigan State University, East Lansing,  
10 MI 48824

11 <sup>b</sup>Department of Plant, Soil and Microbial Sciences, Michigan State University, East Lansing, MI  
12 48824 USA

13 <sup>c</sup>Program in Ecology, Evolutionary Biology and Behavior, Michigan State University, East  
14 Lansing

15

16 Abstract

17 In disturbance ecology, stability is composed of resistance to change and resilience towards  
18 recovery after the disturbance subsides. Two key microbial mechanisms that can support  
19 microbiome stability include dormancy and dispersal. Specifically, microbial populations that are  
20 sensitive to disturbance can be re-seeded by local dormant pools of viable and reactivated cells,  
21 or by immigrants dispersed from regional metacommunities. However, it is difficult to quantify  
22 the contributions of these mechanisms to stability without, first, distinguishing the active from  
23 inactive membership, and, second, distinguishing the populations recovered by local

24 resuscitation from those recovered by dispersed immigrants. Here, we investigate the  
25 contributions of dormancy dynamics (activation and inactivation), and dispersal to soil microbial  
26 community resistance and resilience. We designed a replicated, 45-week time-series experiment  
27 to quantify the responses of the active soil microbial community to a thermal press disturbance,  
28 including control mesocosms, disturbed mesocosms without dispersal, and disturbed mesocosms  
29 with dispersal after the release of the stressor. Communities were sensitive within one week of  
30 warming. Though the disturbed mesocosms did not fully recover within 29 weeks, resuscitation  
31 of thermotolerant taxa was key for community transition during the press, and both resuscitation  
32 of opportunistic taxa and immigration contributed to community resilience. Also, mesocosms  
33 with dispersal were more resilient than mesocosms without. This work advances the mechanistic  
34 understanding of how microbiomes respond to disturbances in their environment.

35

36

37 **Keywords**

38 Stability, disturbance ecology, recovery, resuscitation, 16S rRNA: rRNA gene, metagenomics,  
39 microbial ecology, community assembly, press disturbance, resistance, metacommunity,  
40 immigration

41

## 42 Introduction

43 Ongoing changes to Earth's climate are projected to alter disturbance regimes and to  
44 pervasively expose ecosystems to stressors like elevated atmospheric greenhouse gases and  
45 increased temperatures[1]. Microbial communities, or *microbiomes*, provide vital ecosystem  
46 functions and are key players in determining ecosystem responses to environmental  
47 changes[2,3]. Understanding the mechanisms that underpin microbiome responses to  
48 environmental disturbances will support efforts to predict, and, potentially, manage,  
49 microbiomes toward stable functions within their ecosystems.

50 In disturbance ecology, stability refers to consistent properties in the face of a stressor [4].  
51 Here, we apply terms from disturbance ecology as they have been adopted in microbial  
52 ecology[5,6]. Stability includes components of both resistance and resilience. Resistance is the  
53 capacity of a system to withstand change in the face of a stressor, and its inverse is sensitivity.  
54 Resilience is the rate of return following a disturbance. Recovery is when a system fully returns  
55 to its pre-disturbance state, and an alternative stable state is when the system does not return but  
56 rather assumes a different state. Together, resistance, resilience and recovery are the major  
57 quantifiable components of stability, and they can be calculated from community measurements  
58 of alpha diversity, beta diversity, or function[6,7].

59 There are two related microbial mechanisms that support population persistence in the face  
60 of disturbance, and therefore contribute to community resistance, resilience, and recovery. One  
61 mechanism is microbial dispersal, as successful immigrants can support resilience and recovery  
62 of sensitive populations. Across an interconnected landscape, microbial metacommunities are  
63 linked via dispersal, and so immigrants originate from the regional species pool [8–11]. A second  
64 important but less-considered mechanism is microbial dormancy dynamics [12,13]. Dormancy

65 dynamics include initiation and resuscitation. Initiation into dormancy can support local survival  
66 of populations sensitive to the disturbance, and therefore support community resistance.  
67 Resuscitation from dormancy can support resilience and recovery by re-seeding sensitive  
68 populations from the local dormant pool. Thus, while both dispersal and resuscitation can  
69 support microbiome stability, dispersed immigrants originate regionally while resuscitated  
70 members originate locally. After a disturbance, if sensitive populations are not repopulated via  
71 immigration or resuscitation, they will become locally extinct and contribute to standing  
72 necromass (aka relic DNA, [14]).

73         We designed a replicated time-series experiment to quantify the contributions of  
74 dormancy dynamics and dispersal to the response of a soil microbiome to a thermal press  
75 disturbance. We targeted a soil microbiome because terrestrial microbiomes are front-line  
76 responders to climate change and sequesters of carbon [2,3], and therefore an important  
77 constituent to understand for predicting ecosystem outcomes to environmental change. Also,  
78 soils harbor the highest known microbial diversity [15–17] and present a maximum challenge in  
79 deciphering microbiome responses to disturbance. Furthermore, a majority of the microbial cells  
80 or richness in soil is reportedly dormant [12,18], reportedly as high as 80%, representing a  
81 considerable pool of microbial functional potential. Finally, across heterogeneous soils, an  
82 average of 40% of the microbiome DNA was necromass that existed extracellularly[14]. This  
83 suggests that DNA-based methods of determining microbiome dynamics include both inactive  
84 and necromass reservoirs, and that there is need for increased precision to move forward to  
85 quantify mechanisms underpinning microbiome stability.

86         The mesocosm experiment reported here follows our prior field work in Centralia,  
87 Pennsylvania [19–23]. Centralia is the site of an underground coal seam fire that ignited in 1962

88 and advances 5-7 my<sup>-1</sup> along the coal seams[24,25]. The coal seams are highly variable in depth,  
89 but average 70 m below the surface[24], so as the fire advances underground it warms the  
90 overlying surface soils to mesothermal to thermal conditions . After the fire advances, previously  
91 warmed soils cool to ambient temperatures. In the field, we observed that previously warmed  
92 soils recovered towards reference soils in bacterial and archaeal community structure, with the  
93 exception of a slightly increased selection for Acidobacteria in the recovered soils (attributable to  
94 lower soil pH after coal combustion,[19]). However, during fire impact, there was high  
95 divergence among soil communities, and we hypothesized that differences in dormancy  
96 dynamics (e.g., different members resuscitating and initiating priority effects during the stress)  
97 may explain the divergences. In this experiment, we aimed to control dispersal, and also to  
98 quantify activity dynamics and determine their consistency.

99

## 100 Materials and Methods

### 101 *Soil collection, mesocosm design, and soil sampling*

102 Eight kg of soil was collected in Whirlpack bags from the top ten centimeters of a  
103 reference site in Centralia, PA (site C08, 40 48.084N 076 20.765W) on March 31<sup>st</sup>, 2018. The  
104 site is temperate with the following chemical-physical properties: Organic Matter 4.8%; Nitrate  
105 7.9 ppm; Ammonium 20.5 ppm; pH 5; Sulfur 19 ppm; Potassium 69 ppm; Calcium 490 ppm,  
106 Magnesium 59 ppm; Iron 110 ppm, and Phosphorus 395 ppm. The ambient soil temperature  
107 when collected was 4°C. The sample was stored at 4°C until the experiment was initiated. Soil  
108 was sieved through a 4mm mesh, homogenized, and ~300 g were dispensed into 15 autoclaved  
109 quart-sized glass canning jars that were used as mesocosms (Ball). The homogenized soil sample  
110 intentionally was used in all 15 mesocosms to assess the reproducibility of community temporal

111 dynamics starting from the same soil source. Percent soil moisture was determined using by  
112 massing and drying. Each mesocosm was massed weekly to assess evaporation and any loss of  
113 water mass was replaced with sterile water to maintain percent soil moisture throughout the  
114 experiment. Sterile metal canning lids were secured loosely to prevent anaerobiosis. All set-up  
115 and manipulation of the mesocosms was performed in a Biosafety Level 2 cabinet  
116 (ThermoScientific 1300 Series A2) and we used aseptic technique.

117         Mesocosms first were acclimated at 14°C to mimic the ambient soil temperature at the  
118 typical time of fall soil collection and to coordinate with the field study [19]. Acclimation  
119 proceeded for four weeks in a cooling incubator (Fischer Scientific Isotemp), and then soils were  
120 divided into three treatment groups (**Figure 1**). Six control mesocosms were maintained at 14°C  
121 for the duration of the experiment. Nine disturbance mesocosms were subjected to a 12-week  
122 disturbance regime to simulate a press thermal disturbance. First, the temperature was gradually  
123 increased to 60°C over two weeks (increase period). Second, the temperature was maintained at  
124 60°C 8 weeks. Sixty degrees was chosen because it was close to the observed maximum thermal  
125 temperature that we have measured in surface soils impacted by the Centralia coal seam fire [19].  
126 Next, the temperature was gradually decreased to 14°C over two weeks. Finally, the mesocosms  
127 were maintained at 14°C for four weeks until the penultimate sampling. From the nine disturbed  
128 mesocosms, four were randomly selected for the dispersal treatment. These four disturbed  
129 mesocosms received a dispersal event one week after the temperature was recovered to 14°C  
130 after the thermal disturbance. Each was inoculated with 0.5 mL of a 10% weight by volume soil  
131 slurry made from a composite soil sample from the six control mesocosms. We used soil from  
132 the control mesocosms to simulate dispersal from similar, adjacent soils to repopulate disturbed  
133 communities. Finally, all mesocosms were left undisturbed at 14°C for another 25 weeks prior

134 to the final 45-week sampling. During the final 25 week incubation, percent moisture was not  
135 monitored.

136 Mesocosms were non-destructively sampled after 4, 5, 6, 10, 14, 15, 16, and 20 weeks of  
137 incubation. At each time point, approximately 15 g soil was removed from a mesocosm, of  
138 which ~13 g was flash-frozen in liquid nitrogen for RNA preservation and stored at -80°C until  
139 RNA/DNA co-extraction.

140

#### 141 *RNA/DNA co-extraction*

142 To obtain RNA and DNA from the same cell pool, we minimally modified a manual  
143 coextraction protocol originally published by [26]. For each sample, 0.5 g of flash-frozen soil  
144 was added to Qiagen PowerBead Tubes containing 0.70 mm garnet beads. Next, 500 uL of a 5%  
145 CTAB/Phosphate buffer and 500 uL of phenol:chloroform:isoamyl alcohol were added to each  
146 PowerBead tube. Cells were then lysed using a Model 607 MiniBeadBeater-16 (BioSpec  
147 Products Inc.) for 30 seconds, followed by a 10 min centrifugation at 10,000 x g and 4°C. The  
148 top aqueous layer was transferred to a fresh tube and 500 uL chloroform:isoamyl alcohol was  
149 added. The tubes were inverted several times to form an emulsion before a five minute  
150 centrifugation at 16,000 x g and 4°C. The top aqueous layer was transferred to a clean 1.5 mL  
151 centrifuge tube. Nucleic acids were precipitated by adding two volumes of a 30% PEG6000  
152 1.6M NaCL solution, inverting several times to mix, and incubating on ice for two hours. After  
153 incubation, nucleic acids were pelleted by a 20 min centrifugation at 16,000 x g and 4°C. The  
154 supernatant was removed from each tube and one mL of ice-cold ethanol was added to the  
155 pelleted nucleic acids. Tubes were centrifuged for 15 min at 16,000 x g and 4°C, and the ethanol

156 supernatant was removed. Pelleted nucleic acids were left to air dry before resuspending in 30 uL  
157 of sterile DEPC-treated water.

158 To purify the RNA, co-extracted nucleic acids were diluted 1:100 before treatment with  
159 Ambion Turbo DNA-free DNase kit, using the robust treatment option in the manufacturer's  
160 instructions. Extracted nucleic acids were mixed with 0.1 volumes of the 10X Turbo DNase  
161 Buffer and three uL of TURBO Dnase enzyme (six units total) and incubated at 37°C for 30 min.  
162 After incubation, 0.2 volumes of DNase inactivation reagent was added and incubated for five  
163 minutes at room temperature before a five min centrifugation at 2,000 x g and room temperature.  
164 The treated supernatant was removed and used as the template for Reverse Transcription. RNA  
165 purity was assessed by PCR (see below for details) and showed no amplification. Reverse  
166 transcription was performed with random hexamers using the SuperScript III First-Strand  
167 Synthesis System for RT-PCR(Invitrogen) per manufacturer's instructions.

168 PCR of cDNA and no-RT controls was performed using the Earth Microbiome Project  
169 16S V4 primers(515F 5'-GTGCCAGCMGCCGCGGTAA-3', 806R 5'-  
170 GGACTACHVGGGTWTCTAAT-3') [15,27]. Temperature cycling was as follows: 94°C for  
171 four minutes followed by 30 cycles of 94°C for 45 seconds, 50°C for 60 seconds and 72°C for 90  
172 seconds followed by a final elongation step at 72C for 10 minutes. Products were visualized  
173 using gel electrophoresis.

174

#### 175 *16S rRNA and 16S rRNA gene sequencing and processing*

176 Here, for simplicity we use “microbiome” to refer to the bacterial and archaeal community  
177 members captured by amplifying and Illumina sequencing of the 16S ribosomal RNA and DNA  
178 (rRNA gene). Library preparation and sequencing was performed by the Michigan State



179 University Genomics Core Research Facility. A single library was prepped using the method in  
180 Kozich et al (2013) [28]. PCR products were normalized using Invitrogen SequalPrep DNA  
181 Normalization Plates. This library was loaded onto 4 separate Illumina MiSeq V2 Standard flow  
182 cells and sequenced using 250bp paired end format with a MiSeq V2 500 cycle reagent cartridge.  
183 Base calling was performed by the Illumina Real Time Analysis (RTA) V1.18.54.

184 All samples were first checked for any contaminating primer sequences using cutadapt[29],  
185 before being processed together using the USEARCH pipeline[30,31]. Briefly, paired end reads  
186 were merged using -fastq\_mergepairs and then dereplicated using -fastx\_uniques. Reads were  
187 clustered *de novo* at 97% identity and then the original merged reads were mapped to the  
188 representative sequences of each cluster. Each OTU was classified using SINTAX[32] and with  
189 the Silva database (version 123, [33]).

190

#### 191 *Designating Total and Active Communities*

192 Each RNA and DNA sample was rarefied to 50,000 reads in R using the vegan package  
193 version 2.5-4 [34] discarding any samples which did not contain sufficient reads. Samples for  
194 which either the RNA or DNA did not have 50,000 reads were omitted from the analysis  
195 presented here (12 out of 135 in total). The Total community was defined as the community  
196 recovered in the DNA reads. The Active community was defined per sample, using the DNA  
197 read numbers of those taxa that had 16S rRNA:rRNA gene ratio was >1 in each sample[35].  
198 Consequently, while every sample was initially rarefied to 50,000 reads, each sample's active  
199 community varied slightly in total reads.

200

#### 201 *Quantitative PCR (qPCR)*

202 qPCR was performed on the V4 region of the 16S rRNA gene and conducted in a BioRad  
203 CFX qPCR machine using the Absolute QPCR Mix, SYBR Green, no ROX (Thermo Scientific).  
204 Each reaction contained 12.5ul of the 2X Absolute QPCR Mix, 1.25 ul each of 10uM primers  
205 515F and 806R, 3uL of template DNA and 2uL of PCR grade water. Temperature cycling  
206 conditions were as follows: 15 minutes at 95°C, followed by 39 cycles of 94°C for 45 seconds,  
207 50°C for 60 seconds, and 72°C for 90 seconds, followed by a final elongation step at 72°C for 10  
208 minutes. Fluorescence was measured in each well at the end of every cycle. Extracted gDNA  
209 from *E. coli* MG1655 was used for the standard curve, which was run in triplicate with every  
210 plate. Samples were run in duplicate across different plates and those that amplified after the  
211 lowest point of the standard curve (27 copies per reaction) were treated as zeroes. No template  
212 controls were included in every qPCR plate and they never amplified. Amplification specificity  
213 was assessed by melt curve (60°C to 95°C, 0.5°C increments).

214

### 215 *Ecological statistics*

216 Ecological analyses were performed in R[36]. The adonis function in the vegan package  
217 was used to perform PERMANOVAs[37], and the betadisper function was used to quantify beta  
218 dispersion[38] with Tukey's Honestly Significant Difference post-hoc test. Pairwise tests for  
219 alpha diversity, community size, and resilience values were performed using the Kruskal-Wallis  
220 test, with Dunn's post-hoc correction for multiple comparisons when needed. Principal  
221 coordinates analysis was used for ordination of pairwise sample differences based on Bray-Curtis  
222 dissimilarity. Procrustes superimposition (PROTEST) was performed using the procrustes  
223 function in the vegan package and a false discovery rate adjustment was used for multiple tests.

224 Data visualizations were performed using ggplot2[39]. Heatmaps were made using the  
225 heatmap.2 function in the gplots package[40].

226 Contributions of responsive and immigrant taxa to beta diversity were calculated as the  
227 Bray-Curtis dissimilarity attributed to the responsive taxa subset and divided by the total Bray-  
228 Curtis dissimilarity, both calculated from the Total (DNA) community, as done previously to  
229 assess the contributions of conditionally rare taxa to beta diversity [41]. Responsive taxa were  
230 those that changed in activity between weeks 16, 20, and 45 by their 16S rRNA:rRNA gene,  
231 either from  $< 1$  to  $> 1$  or  $> 1$  to  $< 1$ . Immigrant taxa were undetected in all disturbed mesocosms  
232 at week 16, but detected in Disturbance + Immigration mesocosms at either week 20 or week 45  
233 while remaining undetected in the Disturbance mesocosms.

234

#### 235 *Data availability and code*

236 Sequence workflows, OTU tables, and statistical workflows to reproduce the analyses  
237 described here are available on GitHub

238 ([https://github.com/ShadeLab/PAPER\\_Sorensen\\_InPrep\\_Mesocosms](https://github.com/ShadeLab/PAPER_Sorensen_InPrep_Mesocosms)). All raw sequence data  
239 are deposited in the NCBI Short Read Archive under BioProject PRJNA559185.

240

## 241 Results

### 242 *Sequencing summary*

243 In total, we sequenced 135 pairs of samples (cDNA and DNA) across nine timepoints and  
244 15 mesocosms. We rarefied all samples to 50,000 reads, and removed those samples with fewer  
245 than 50,000 reads. This resulted in the removal of 12 samples and left 53 Control, 36  
246 Disturbance, and 34 Disturbance + Immigration pairs of samples. After rarefaction, sample

247 richness ranged from 84 to 4,108, with 16,854 total OTUs observed, inclusive of both DNA and  
248 RNA datasets.

249

### 250 *Overarching responses to the thermal press disturbance*

251 Total community richness responded consistently and as expected to the thermal press  
252 disturbance. There was a notable bottle effect of maintaining field soil in mesocosms, indicated  
253 by the gradual decrease in richness over time in the Control treatment (**Figure 2AB**). In the  
254 Disturbance treatment, there was a modest but statistically supported decrease in richness one  
255 week after warming from 14°C to 37 °C (week 5 all Disturbance v. Control comparison,  
256 Kruskal-Wallis test,  $p = 0.003$ ), and then a more substantial decrease after warming to 60°C at  
257 week 6 (Kruskal-Wallis test,  $p = 0.002$ ). Community size was estimated using copies of the 16S  
258 rRNA gene measured with qPCR (**Figure 3**). Disturbance community size decreased over weeks  
259 four to seven and then maintained at a median of  $1.03 \times 10^7$  rRNA gene copies per g soil. Control  
260 communities decreased until week seven (bottle effect) and then increased rapidly by week ten  
261 and generally stabilized at median of  $2.98 \times 10^8$  16S rRNA gene copies/g soil (**Figure 3A**).  
262 Together, these results show that the warming treatment acted as an environmental filter,  
263 resulting either in death or population decreases past the limits of detection for taxa that were  
264 otherwise fit in temperate conditions. Furthermore, there was a small but appreciable increase in  
265 richness after the dispersal event in the Disturbance + Immigration treatment, relative to the  
266 Disturbance treatment (Kruskal – Wallis test  $p = 0.088$  at week 20, and  $p = 0.168$  at week 45),  
267 and this increase was also observed for community size, which approaches recovery towards the  
268 control (Kruskal – Wallis test Control vs Disturbance + Immigration  $p = 0.11$ , Control vs  
269 Disturbance  $p = 0.0004$ , Disturbance vs Disturbance + Immigration  $p = 0.013$ ) (**Figure 3B**). This

270 suggests that the dispersal treatment was effective in promoting recovery of richness and  
271 community size. However, warmed mesocosms did not completely recover richness to the level  
272 of the ambient Controls, even by week 45 (**Figure 2B**). Evenness followed the same overarching  
273 patterns as richness (**Figure 2CD**).

274 We compared community structure across treatments for the Total community dataset,  
275 rRNA gene; 14,159 OTUs) and the Active dataset (rRNA:rRNA gene > 1; 6,693 = OTUs). There  
276 were clear and consistent shifts in beta diversity in the Disturbance mesocosms, as well as high  
277 reproducibility among replicates for all treatments (**Figure 4, Figure 5**). Over the experiment,  
278 Disturbance mesocosms had distinct community structures than Control (Disturbance v. Control  
279 PERMANOVA PsuedoF = 63.87, Rsqr = 0.345, p=0.001 for Total communities, and  
280 PsuedoF=35.97, Rsqr=0.229, p=0.001 for Active communities). Control communities were  
281 relatively stable over the study, while Disturbance communities changed directionally, and were  
282 significantly different from Control communities after a single week of warming (week 5  
283 Control vs Disturbed PERMANOVA PsuedoF = 3.06, Rsqr= 0.218, p=0.001 for Total  
284 community and PsuedoF= 2.88, Rsqr=0.208, p=0.001 for Active community). Disturbance  
285 communities continued to shift with temperature during the course of the experiment, and then  
286 shifted back towards the Control after the stressor was released. Though no Disturbance  
287 mesocosms fully recovered to overlap with the Control communities, the mesocosms with  
288 dispersal achieved more complete recovery than those without. Total communities and Active  
289 communities were synchronous in their temporal trajectories (Mantel R =0.943, p = 0.001 on 999  
290 permutations; Protest Sum of Squares =0.238, R= 0.873, p=0.001), but there was higher  
291 betadispersion in the Disturbance treatment for the Active communities (Comparing Total v.  
292 Active for Disturbance mesocosms, Kruskal Wallis p=0.029). This suggests that there was

293 Active community variability masked by the contributions of dead and dormant taxa to the Total  
294 community.

295 Replicate disturbed mesocosms (n=9, inclusive of Disturbance and Disturbance +  
296 Immigration) had highly reproducible responses to the press. They had high overlap in  
297 membership and overall synchronous trajectories, even after the immigration event at week 16  
298 (33 of 36 PROTEST all  $R > 0.89$  and false-discovery rate adjusted p-values  $< 0.05$ ).

299

### 300 *Resistance and resilience*

301 Using the Active community, we calculated resistance and resilience of the Disturbance  
302 treatment relative to the Control using community divergence from the first sampling  
303 time(Week4) as the reference (**Figure 6A**). Even in the Control communities, there was an initial  
304 drop in similarity between weeks 4 and 5, which we attribute to the bottle effect. However, after  
305 that the Control communities remain relatively stable with no additional divergence, while the  
306 Disturbance communities decrease to their maximum divergence at week 10 (60°C).

307 Disturbed communities with Immigration converge slightly after the dispersal event.  
308 Overall resistance was low (**Figure 6B**), and resilience reached its maximum, 0.41, in the  
309 immigration treatment between weeks 16 (the time point at which the thermal press was  
310 released) and the final week 45, but ranged from a minimum of 0.04 between week 16 and 20 in  
311 the Disturbance without immigration treatment (**Figure 6C-E**). Immigration enhanced resilience  
312 from week 16 to week 20 (Kruskal Wallis p value 0.034) and from week 16 to week 45 (Kruskal  
313 Wallis p value 0.083), but not from week 20 to 45, possibly because of insufficient power  
314 (Kruskal Wallis p value 0.180). There were only two Disturbance replicates (out of five) that met  
315 our rarefaction threshold for week 45.

316 For the recovery period (weeks 16-45), we wanted to assess the relative contributions of  
317 activity dynamics and immigration to the overall beta diversity in **Figure 2A**. We calculated the  
318 relative contribution of activity dynamics by identifying taxa that switched from an active or  
319 inactive state to the other during this recovery period. We found that these dynamically active  
320 taxa contributed 11.7% to 58.9% (median 28.9%) of the observed beta diversity, while  
321 immigrants contributed 8.1% to 27.3% (median 15.5%) of the observed beta diversity during the  
322 same time period.

323  
324 *Activity dynamics of responsive taxa*

325 To understand potential roles of dormancy initiation and resuscitation in driving  
326 community resistance and resilience, we wanted to distinguish taxa that changed in their activity  
327 or their detection over the course of the disturbance. Taxa that fell below detection (there was no  
328 rRNA gene detected in a particular sample) were distinguished from taxa that became inactive  
329 (rRNA:rRNA gene shifted from  $> 1$  to  $< 1$ ). For this analysis, we used the Active community but  
330 coded taxa that fell below detection as NAs to distinguish them from inactive taxa, which were  
331 coded as 0. Notably, taxa that fell below detection could have been either active, inactive, or  
332 locally extinct.

333 To conservatively attribute activity dynamics, we restricted this analysis only to the taxa  
334 that were among the 50 most abundant over the course of the experiment (**Figure 7A**). Within  
335 this set, we detected no purely resistant taxa that were consistently active throughout the  
336 experiment. This finding agrees with the analyses showing low resistance (**Figure 6B**) and  
337 substantial shifts in the Disturbance communities (**Figure 5**).

338           We detected 17 taxa that were sensitive to the disturbance (**Figure 7B**). Sensitive taxa  
339           were active prior to the warming but became inactive or dropped below detection during the  
340           warming, and then did not reactivate. We also detected 19 transition taxa that were inactive prior  
341           to the warming, active during the warming, and then became inactive after the stressor was  
342           released. Because there was no external dispersal into the system, these thermotolerant taxa were  
343           likely in the dormant pool of the soil. We could divide these responses generally into early and  
344           late transition taxa. There were 6 early transition taxa that became active during week 5 or 6 of  
345           the experiment, but then became inactive at weeks 10 and 14. There were also 13 late transition  
346           taxa that remained inactive during weeks 5 and 6 but became active during weeks 10 and 14.

347           Among the top 50 taxa, we did not detect purely resilient taxa that were active prior to the  
348           warming, became inactive during the warming, but then reactivated after the return to ambient  
349           temperature. This suggests that dormancy strategies responsive to warming were not a  
350           substantial contributor to member preservation, nor to eventual re-seeding. Instead, opportunists  
351           and immigrants facilitated resilience in the mesocosms. Five opportunists were inactive or below  
352           detection prior to and during the warming, but then activated after the temperature returned,  
353           likely due to resuscitation. Eight immigrants were generally active prior to the warming, dropped  
354           to below detection or became inactive during the warming, and then in the end, were active again  
355           only in the Disturbance + Immigration treatment (and not in the Disturbance mesocosms without  
356           immigration).

357

### 358 *Relationships between taxon activity and abundance*

359           The conventional thought is that relative abundance is the outcome of growth and  
360           therefore an indicator of fitness, and so high relative abundance is indicative of recent or current



361 activity in the environment. However, we detected a weak, but statistically supported, inverse  
362 (log<sub>10</sub>) relationship between OTU 16S rRNA:rRNA gene ratio and relative abundance for those  
363 taxa with an rRNA:rRNA gene ratio >1 (**Figure 8A**, Pearson's  $R = -.14$ ,  $p < 0.0001$ ). This result  
364 is in agreement with other studies that have suggested that rare taxa may have high activity levels  
365 relative to their abundance in the community [42–46]. We present it here to be transparent that  
366 there are likely additional active but rare members that contribute to stability that have not been  
367 considered in our analyses.

368         The inverse relationship between activity and abundance could not include taxa that had  
369 RNA but no DNA detected (aka “phantom taxa”, [44]) because they have an undefined 16S  
370 rRNA:rRNA gene ratio. We make clear that, to be conservative, phantom taxa (that have RNA  
371 but no DNA detected) were not included in the analyses, and that rare taxa that had high activity  
372 ratios were not included in the description of activity response patterns among the top 50 most  
373 abundant taxa. On balance, phantom taxa contributed proportionally few rRNA reads and few  
374 unique OTUs to the dataset (**Figure 8B and 8C**). However, there were a few exceptions,  
375 including five samples that had >10% rRNA reads and > 50% of richness attributed to phantom  
376 taxa. Four of these were from the Disturbance mesocosms at week 14 (peak-thermal press), and  
377 one sample was from week 16, at the end of the press. These samples also had relatively low  
378 richness and community size (**Figure 2 and 3**). We speculate that, by reducing community size  
379 and likely also total microbial biomass, the disturbance indirectly provoked relatively higher  
380 contributions by phantom taxa and conditionally rare taxa [47].

381

382 Discussion

383           These results show that both dispersal and local dormancy dynamics, including activation  
384 and inactivation, can contribute to overarching patterns of community resilience. The dispersal  
385 event simulated in this experiment posed an optimistic scenario: well-mixed, control soils were  
386 mixed into disturbed soils to maximize the volume of the disturbed soil that came into contact  
387 with the inoculum. Regardless, by all metrics (beta diversity, alpha diversity, community size),  
388 immigration was very successful. Our data directly show that dispersal can augment resilience  
389 towards recovery. Given that the influences of dispersal on community assembly has been  
390 investigated previously (often indirectly for bacterial and archaeal microbiomes, as inferred from  
391 the contributions of stochastic or neutral processes e.g., [19,48–51]), this result is in agreement  
392 with the consensus of the literature that dispersal and dispersal limitation can matter for assembly  
393 [52–54].

394           A new result is that local resuscitation also contributes to microbiome community  
395 transitions during disturbance, and to resilience after the stress is released. Among the most  
396 abundant taxa, there were near equal numbers of taxa that contributed to resilience via  
397 opportunistic resuscitation and to resilience via immigration. Therefore, both mechanisms – local  
398 resuscitation and regional immigration – are important for microbiome stability. The microbial  
399 dormant pool is important for maintaining microbial diversity [43] and has evolutionary  
400 implications for traits that persist within inactive populations [55]. To make more explicit the  
401 role of dormancy dynamics for community disturbance responses (e.g., [56]), the phenomenon of  
402 the “storage effect” underpins modern coexistence theory [57] and refers to the ability of  
403 competing species to coexist when their growth and activities are separately partitioned over  
404 time, typically in dynamic environments [58]. Given the severity of the thermal stressor in  
405 Centralia and in this experiment, our results suggest that the soil microbial dormant pool is deep,

406 in that it contains functionality for distinctive conditions, like thermal stress, that are not within  
407 the expected range of environmental variability.

408 Another goal of the experiment was to understand the reproducibility of member  
409 resuscitation given the press, and from the same soil. Because we observed high divergence in  
410 the hot field soil communities in Centralia that was not attributable to any measured soil  
411 environmental variable, including temperature, we hypothesized that stochastic resuscitation  
412 from the soil could initiate priority effects (e.g., [9]), leading to divergent hot communities.  
413 However, there was strong reproducibility among replicate disturbed mesocosms, suggesting that  
414 there were particular microorganisms that consistently responded to the thermal stress from the  
415 same soil. Therefore, we interpret that resuscitation in response to the thermal stress was largely  
416 deterministic, and that observed divergences among hot soil communities in the field may be  
417 instead attributed to either differences local edaphic factors that were unmeasured, or different  
418 underlying dormant pools, or stochasticity in regional dispersal. Thus, our hypothesis regarding  
419 priority effects by stochastic resuscitation was not supported.

420 Moving forward, there are several insights gleaned from this experiment. For soil,  
421 measuring dispersal in the field is difficult, given the various means by which microorganisms  
422 may arrive to a locality, including wind, ground water, and invertebrate vectors. However, there  
423 are several methods, each with their own caveats and biases [18,35,59,60], to measure activity  
424 and the pool of dormant organisms, and so this has become possible even with field soils. We  
425 recommend to collect member activity data for soils, to characterize the dormant pool, and to  
426 develop database infrastructure to support meta-analyses of these distinct activity-linked data  
427 resources. Also, microbiome stability is a dynamic process that involves both transition and  
428 resilience, and longitudinal series that are inclusive of the entire trajectory are informative.

429 Characterizing the full disturbance trajectory will allow for quantification of the changing  
430 mechanisms that support stability, and will facilitate prediction of microbiome outcomes to new  
431 stressors. In our experiment, one week of stress was sufficient to observe community sensitivity  
432 (by week 5, the control and the disturbance treatments were statistically different), but 29 weeks  
433 after the stress was not sufficient to observe complete recovery, though it seems that recovery is  
434 possible given the trajectory toward the controls. For many soils, we expect that this time frame  
435 of response may be typical [61] and it can be used to inform future studies.

436         To conclude, this experiment shows both dispersal and dormancy dynamics can  
437 contribute to soil microbiome resilience in response to a press stress. Specifically, resuscitation  
438 of thermotolerant members contributed to transition during press, and then immigration provided  
439 a substantial boost to recovery beyond what was achieved with resuscitated opportunists.  
440 Because activity responses to the disturbance were consistent, these results suggest that  
441 predictive insights into microbiome resilience can be advanced more generally. We expect that  
442 accounting for mechanisms of local resuscitation and regional dispersal together will advance  
443 quantitative understanding of environmental microbiome stability.

444

445

446 Acknowledgements

447 This work was supported by the National Science Foundation under Grant No DEB#1749544.

448 This work was supported in part by Michigan State University through computational resources  
449 provided by the Institute for Cyber-Enabled Research. We thank Johnathon Higgins for technical  
450 assistance in the laboratory.

451

452 References

- 453 1. IPCC. 2014 *Climate Change 2014*. (doi:10.1017/CBO9781107415324)
- 454 2. Cavicchioli R *et al.* 2019 Scientists' warning to humanity: microorganisms and climate  
455 change. *Nat. Rev. Microbiol.* (doi:10.1038/s41579-019-0222-5)
- 456 3. Singh BK, Bardgett RD, Smith P, Reay DS. 2010 Microorganisms and climate change:  
457 Terrestrial feedbacks and mitigation options. *Nat. Rev. Microbiol.*  
458 (doi:10.1038/nrmicro2439)
- 459 4. Pimm SL. 1984 The complexity and stability of ecosystems. *Nature* **307**, 321–326.
- 460 5. Allison SD, Martiny JBH. 2008 Resistance, resilience, and redundancy in microbial  
461 communities. *Proc. Natl. Acad. Sci. U. S. A.* **105**, 11512–11519.
- 462 6. Shade A *et al.* 2012 Fundamentals of microbial community resistance and resilience.  
463 *Front. Microbiol.* **3**, 417. (doi:10.3389/fmicb.2012.00417)
- 464 7. Orwin KH, Wardle DA. 2004 New indices for quantifying the resistance and resilience of  
465 soil biota to exogenous disturbances. *Soil Biol. Biochem.* **36**, 1907–1912.  
466 (doi:10.1016/j.soilbio.2004.04.036)
- 467 8. Leibold MA *et al.* 2004 The metacommunity concept: A framework for multi-scale  
468 community ecology. *Ecol. Lett.* **7**, 601–613. (doi:10.1111/j.1461-0248.2004.00608.x)
- 469 9. Fukami T. 2015 Historical contingency in community assembly : integrating niches,  
470 species pools, and priority effects. *Annu. Rev. Ecol. Evol. Syst.* **46**, 1–23.  
471 (doi:10.1146/annurev-ecolsys-110411-160340)
- 472 10. Langenheder S, Berga M, Östman Ö, Székely AJ. 2012 Temporal variation of  $\beta$ -diversity  
473 and assembly mechanisms in a bacterial metacommunity. *ISME J.* **6**, 1107–1114.  
474 (doi:10.1038/ismej.2011.177)

- 475 11. Nemergut DR *et al.* 2013 Patterns and processes of microbial community assembly.  
476 *Microbiol. Mol. Biol. Rev.* **77**, 342–356. (doi:10.1128/MMBR.00051-12)
- 477 12. Lennon JT, Jones SE. 2011 Microbial seed banks: the ecological and evolutionary  
478 implications of dormancy. *Nat. Rev. Microbiol.* **9**, 119–130.
- 479 13. Hawkes C V., Keitt TH. 2015 Resilience vs. historical contingency in microbial responses  
480 to environmental change. *Ecol. Lett.* **18**, 612–625. (doi:10.1111/ele.12451)
- 481 14. Carini P, Marsden PJ, Leff JW, Morgan EE, Strickland MS, Fierer N. 2016 Relic DNA is  
482 abundant in soil and obscures estimates of soil microbial diversity. *Nat. Microbiol.* **2**,  
483 16242. (doi:10.1101/043372)
- 484 15. Thompson LR *et al.* 2017 A communal catalogue reveals Earth’s multiscale microbial  
485 diversity. *Nature* **551**. (doi:10.1038/nature24621)
- 486 16. Locey KJ, Lennon JT. 2016 Scaling laws predict global microbial diversity. *Proc. Natl.*  
487 *Acad. Sci. U. S. A.* **113**, 5970–5975. (doi:10.7287/peerj.preprints.1451v1)
- 488 17. Louca S, Mazel F, Doebeli M, Parfrey LW. 2019 A census-based estimate of earth’s  
489 bacterial and archaeal diversity. *PLoS Biol.* (doi:10.1371/journal.pbio.3000106)
- 490 18. Blagodatskaya E, Kuzyakov Y. 2013 Active microorganisms in soil: Critical review of  
491 estimation criteria and approaches. *Soil Biol. Biochem.* **67**, 192–211.  
492 (doi:10.1016/j.soilbio.2013.08.024)
- 493 19. Lee S-H, Sorensen JW, Grady KL, Tobin TC, Shade A. 2017 Divergent extremes but  
494 convergent recovery of bacterial and archaeal soil communities to an ongoing  
495 subterranean coal mine fire. *ISME J.* **11**, 1447–1459. (doi:10.1038/ismej.2017.1)
- 496 20. Sorensen JW, Dunivin TK, Tobin TC, Shade A. 2018 Ecological selection for small  
497 microbial genomes along a temperate-to-thermal soil gradient. *Nat. Microbiol.*

- 498 21. Dunivin TK, Shade A. 2018 Community structure explains antibiotic resistance gene  
499 dynamics over a temperature gradient in soil. *FEMS Microbiol. Ecol.* **fiy016**.  
500 (doi:<https://doi.org/10.1093/femsec/fiy016>)
- 501 22. Kearns PJ, Shade A. 2017 Trait-based patterns of microbiome succession in dormancy and  
502 heterotrophic strategy. *PeerJ Prepr.* **5**.
- 503 23. Tobin-Janzen T *et al.* 2005 Nitrogen Changes and Domain Bacteria Ribotype Diversity in  
504 Soils Overlying the Centralia, Pennsylvania Underground Coal Mine Fire. *Soil Sci.* **170**,  
505 191–201. (doi:[10.1097/00010694-200503000-00005](https://doi.org/10.1097/00010694-200503000-00005))
- 506 24. Nolter MA, Vice DH. 2004 Looking back at the Centralia coal fire: a synopsis of its  
507 present status. *Int. J. Coal Geol.* **59**, 99–106. (doi:[10.1016/j.coal.2003.12.008](https://doi.org/10.1016/j.coal.2003.12.008))
- 508 25. Elick JM. 2011 Mapping the coal fire at Centralia, Pa using thermal infrared imagery. *Int.*  
509 *J. Coal Geol.* **87**, 197–203. (doi:[10.1016/j.coal.2011.06.018](https://doi.org/10.1016/j.coal.2011.06.018))
- 510 26. Griffiths R, Whiteley A, O'Donnell A. 2000 Rapid method for coextraction of DNA and  
511 RNA from natural environments for analysis of Ribosomal DNA- and rRNA-Based  
512 Microbial Community Composition. *Appl. Environ. Microbiol.* **66**, 5488–5491.  
513 (doi:[10.1021/ja00751a011](https://doi.org/10.1021/ja00751a011))
- 514 27. Caporaso JG, Lauber CL, Walters WA, Berg-Lyons D, Lozupone CA, Turnbaugh PJ,  
515 Fierer N, Knight R. 2011 Global patterns of 16S rRNA diversity at a depth of millions of  
516 sequences per sample. *Proc. Natl. Acad. Sci. U. S. A.* **108**, 4516.
- 517 28. Kozich JJ, Westcott SL, Baxter NT, Highlander SK, Schloss PD. 2013 Development of a  
518 dual-index sequencing strategy and curation pipeline for analyzing amplicon sequence  
519 data on the MiSeq Illumina sequencing platform. *Appl. Environ. Microbiol.* **79**, 5112–20.  
520 (doi:[10.1128/AEM.01043-13](https://doi.org/10.1128/AEM.01043-13))

- 521 29. Martin M. 2011 Cutadapt removes adapter sequences from high-throughput sequencing  
522 reads. *EMBnet.journal* **17**, 10-12. (doi:10.14806/ej.17.1.200)
- 523 30. Edgar RC. 2010 Search and clustering orders of magnitude faster than BLAST.  
524 *Bioinformatics* **26**, 2460–2461. (doi:10.1093/bioinformatics/btq461)
- 525 31. Edgar RC, Flyvbjerg H. 2014 Error filtering, pair assembly and error correction for next-  
526 generation sequencing reads. *Bioinformatics* **31**, 3476–3482.  
527 (doi:10.1093/bioinformatics/btv401)
- 528 32. Edgar RC. 2016 SINTAX: a simple non-Bayesian taxonomy classifier for 16S and ITS  
529 sequences. *bioRxiv* (doi:10.1101/074161)
- 530 33. Quast C, Pruesse E, Yilmaz P, Gerken J, Schweer T, Yarza P, Peplies J, Glöckner FO.  
531 2013 The SILVA ribosomal RNA gene database project: Improved data processing and  
532 web-based tools. *Nucleic Acids Res.* **41**. (doi:10.1093/nar/gks1219)
- 533 34. Oksanen J, Kindt R, Legendre P, O’Hara B. 2006 The vegan Package for Community  
534 Ecology. , Ordination methods and other useful functions for.
- 535 35. Bowsher AW, Kearns PJ, Shade A. 2019 16S rRNA/rRNA Gene Ratios and Cell Activity  
536 Staining Reveal Consistent Patterns of Microbial Activity in Plant-Associated Soil.  
537 *mSystems* **4**, e00003-19. (doi:10.1128/msystems.00003-19)
- 538 36. R Core Team. 2017 R: A Language and Environment for Statistical Computing.
- 539 37. Anderson MJ. 2001 A new method for non-parametric multivariate analysis of variance.  
540 *Austral Ecol.* **26**, 32–46.
- 541 38. Anderson MJ. 2005 Distance-Based Tests for Homogeneity of Multivariate Dispersions.  
542 *Biometrics* **62**, 245–253.
- 543 39. Wickham H. 2009 *ggplot2: Elegant graphics for data analysis*. New York: Springer-



- 544 Verlag. See <http://ggplot2.org>.
- 545 40. Warnes GR *et al.* 2016 gplots: Various R Programming Tools for Plotting Data.
- 546 41. Shade A *et al.* 2014 Conditionally rare taxa disproportionately contribute to temporal  
547 changes in microbial diversity. *MBio* **5**, e01371-14. (doi:10.1128/mBio.01371-14)
- 548 42. Aanderud Z, Jones S, Fierer N, Lennon JT. 2015 Resuscitation of the rare biosphere  
549 contributes to pulses of ecosystem activity. *Front. Microbiol.* **6**, 1–11.  
550 (doi:10.3389/fmicb.2015.00024)
- 551 43. Jones SE, Lennon JT. 2010 Dormancy contributes to the maintenance of microbial  
552 diversity. *Proc. Natl. Acad. Sci. U. S. A.* **107**, 5881–5886. (doi:10.1073/pnas.0912765107)
- 553 44. Klein AM, Bohannan BJM, Jaffe DA, Levin DA, Green JL. 2016 Molecular evidence for  
554 metabolically active bacteria in the atmosphere. *Front. Microbiol.*  
555 (doi:10.3389/fmicb.2016.00772)
- 556 45. Jia Y, Leung MHY, Tong X, Wilkins D, Lee PKH. 2019 Rare Taxa Exhibit  
557 Disproportionate Cell-Level Metabolic Activity in Enriched Anaerobic Digestion  
558 Microbial Communities. *mSystems* (doi:10.1128/msystems.00208-18)
- 559 46. Wilhelm L, Besemer K, Fasching C, Urich T, Singer GA, Quince C, Battin TJ. 2014 Rare  
560 but active taxa contribute to community dynamics of benthic biofilms in glacier-fed  
561 streams. *Environ. Microbiol.* **16**, 2514–2524. (doi:10.1111/1462-2920.12392)
- 562 47. Shade A, Jones SE, Gregory Caporaso J, Handelsman J, Knight R, Fierer N, Gilbert JA.  
563 2014 Conditionally rare taxa disproportionately contribute to temporal changes in  
564 microbial diversity. *MBio* **5**, 1–9. (doi:10.1128/mBio.01371-14)
- 565 48. Ferrenberg S *et al.* 2013 Changes in assembly processes in soil bacterial communities  
566 following a wildfire disturbance. *ISME J.* **7**, 1102–1111. (doi:Doi 10.1038/Ismej.2013.11)

- 567 49. Dini-Andreote F, Stegen JC, van Elsas JD, Salles JF. 2015 Disentangling mechanisms that  
568 mediate the balance between stochastic and deterministic processes in microbial  
569 succession. *Proc. Natl. Acad. Sci.* **112**, E1326–E1332. (doi:10.1073/pnas.1414261112)
- 570 50. Burns AR, Zac Stephens W, Stagaman K, Wong S, Rawls JF, Guillemin K, Bohannan BJ.  
571 2016 Contribution of neutral processes to the assembly of gut microbial communities in  
572 the zebrafish over host development. *ISME J.* **10**, 655–664. (doi:10.1038/ismej.2015.142)
- 573 51. Zhou J *et al.* 2013 Stochastic assembly leads to alternative communities with distinct  
574 functions in a bioreactor microbial community. *MBio* (doi:10.1128/mBio.00584-12)
- 575 52. Evans S, Martiny JB, Allison SD. 2017 Effects of dispersal and selection on stochastic  
576 assembly in microbial communities. *ISME J.* **11**, 176–185. (doi:10.1038/ismej.2016.96)
- 577 53. Günther S, Faust K, Schumann J, Harms H, Raes J, Müller S. 2016 Species-sorting and  
578 mass-transfer paradigms control managed natural metacommunities. *Environ. Microbiol.*  
579 **18**, 4862–4877. (doi:10.1111/1462-2920.13402)
- 580 54. Nemergut DR *et al.* 2016 Decreases in average bacterial community rRNA operon copy  
581 number during succession. *ISME J.* **10**, 1147–1156. (doi:10.1038/ismej.2015.191)
- 582 55. Shoemaker WR, Lennon JT. 2018 Evolution with a seed bank: The population genetic  
583 consequences of microbial dormancy. *Evol. Appl.* **11**, 60–75. (doi:10.1111/eva.12557)
- 584 56. Miller AD, Chesson P. 2009 Coexistence in disturbance-prone communities: how a  
585 resistance-resilience trade-off generates coexistence via the storage effect. *Am. Nat.* **173**,  
586 E30–E43. (doi:10.1086/597669)
- 587 57. Warner RR, Chesson PL. 1985 Coexistence mediated by recruitment fluctuations - a field  
588 guide to the storage effect. *Am. Nat.* **125**, 769–787.
- 589 58. Barabás G, D’Andrea R, Stump SM. 2018 Chesson’s coexistence theory. *Ecol. Monogr.*

590 (doi:10.1002/ecm.1302)

591 59. Blazewicz SJ, Barnard RL, Daly RA, Firestone MK. 2013 Evaluating rRNA as an  
592 indicator of microbial activity in environmental communities: limitations and uses. *ISME*  
593 *J.* **7**, 2061–8. (doi:10.1038/ismej.2013.102)

594 60. Dlott G, Maul JE, Buyer J, Yarwood S. 2015 Microbial rRNA: RDNA gene ratios may be  
595 unexpectedly low due to extracellular DNA preservation in soils. *J. Microbiol. Methods*  
596 **115**, 112–120. (doi:10.1016/j.mimet.2015.05.027)

597 61. Shade A, Gregory Caporaso J, Handelsman J, Knight R, Fierer N. 2013 A meta-analysis  
598 of changes in bacterial and archaeal communities with time. *ISME J.* **7**, 1493–1506.  
599 (doi:10.1038/ismej.2013.54)

600

601

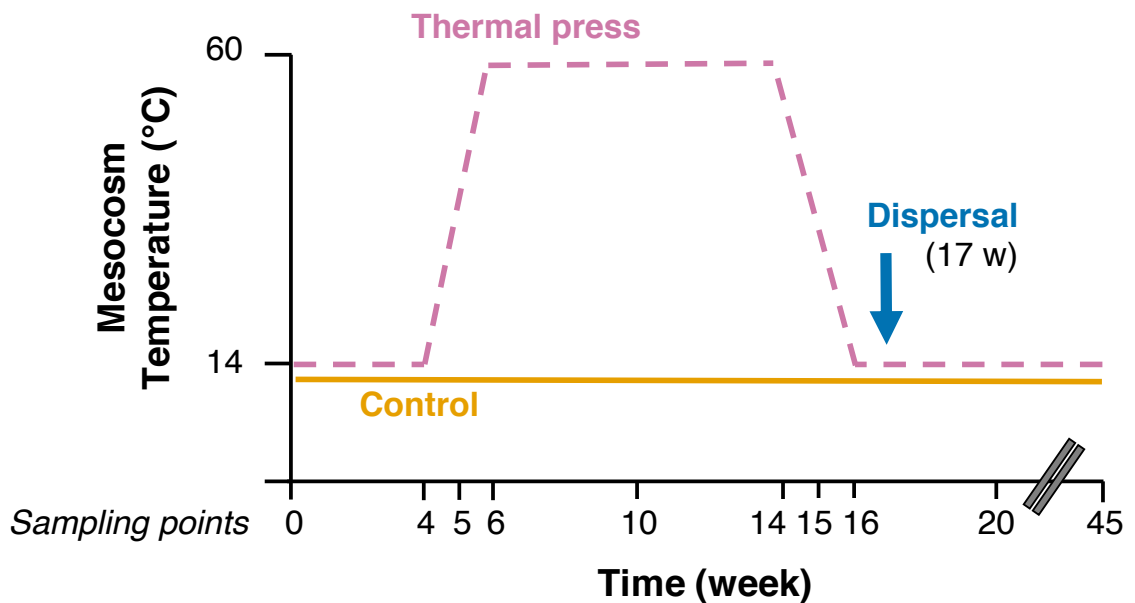

Experimental phase

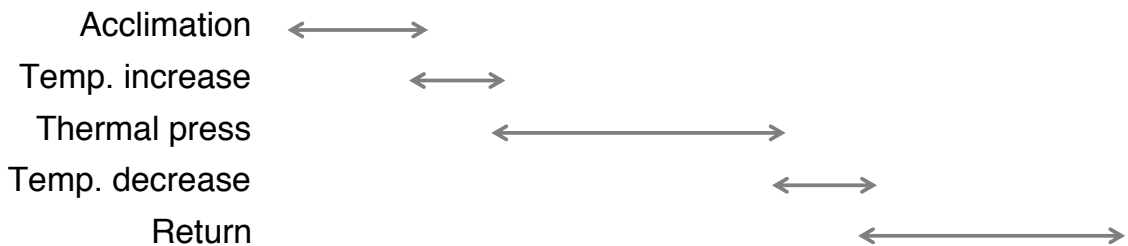

603

604 **Figure 1. Experimental design of the study.** Reference temperate soil (0-20 cm depth from  
 605 surface) was homogenized and divided among fifteen 1 L glass mesocosms that were maintained  
 606 at ambient moisture through the experiment. Control mesocosms (solid gold line, n = 6) were  
 607 maintained at 14°C, which was ambient soil temperature at the time of collection. Disturbance  
 608 mesocosms (dashed pink line, n = 9) were acclimated for four weeks at 14°C, increased to 60°C  
 609 over two weeks, maintained at 60°C as a thermal press disturbance for eight weeks, then  
 610 decreased back to 14°C over two weeks, and finally maintained for a total of 45 weeks. Four of  
 611 the disturbance mesocosms received a dispersal event (homogenized soil slurry from Control

612 mesocosms, see methods) at week 17, after the thermal press was released. Note the break in the  
613 x-axis time scale between weeks 20 and 45.

614

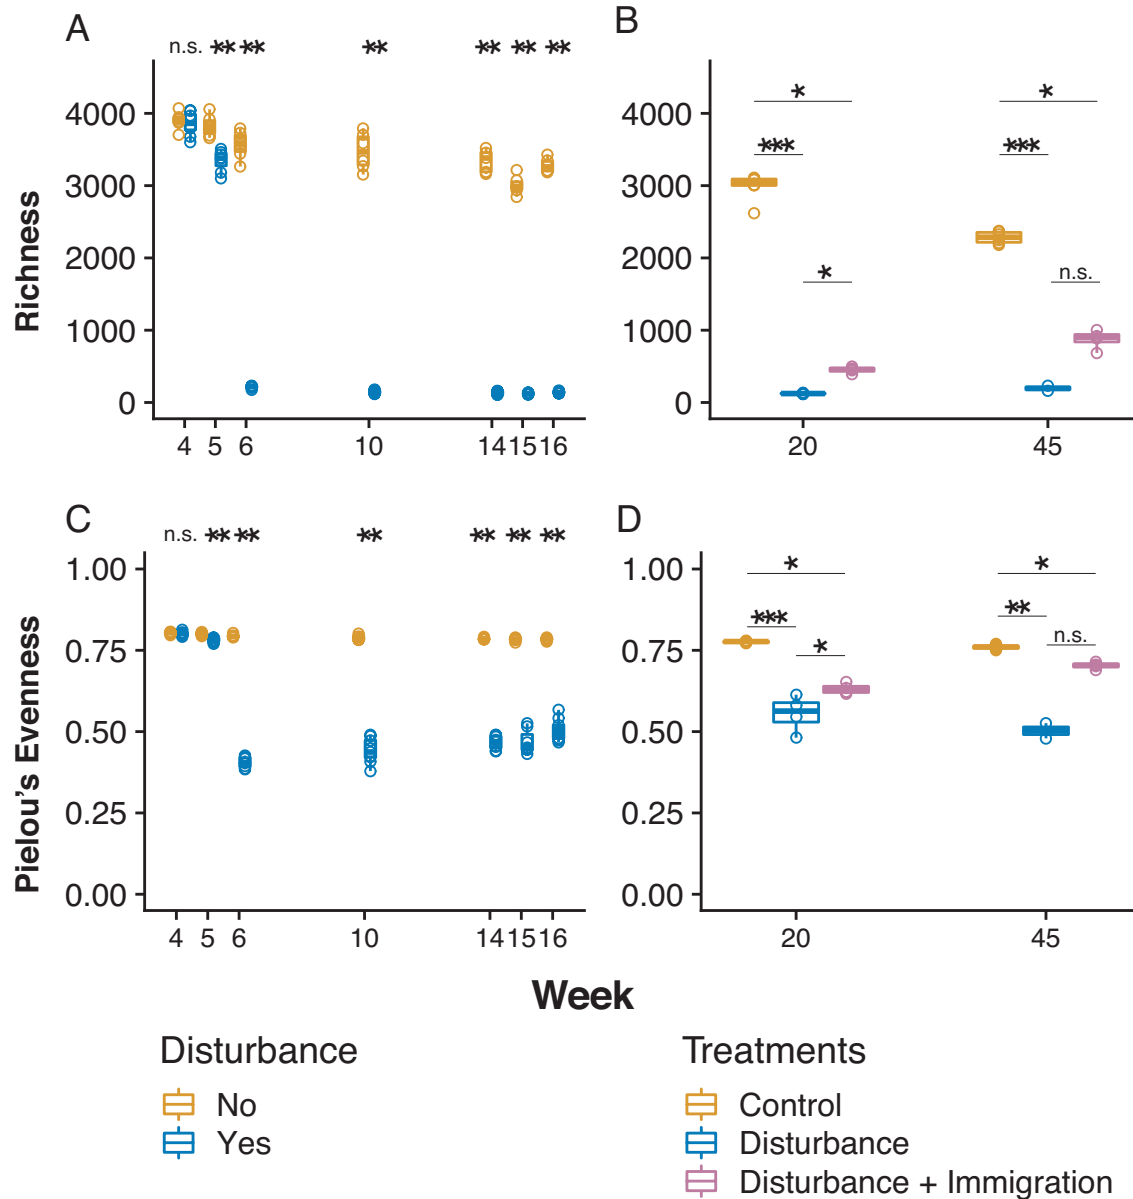

615

616 **Figure 2. Changes in alpha diversity over the disturbance experiment.** Alpha diversity was  
 617 assessed using operational taxonomic units clustered at 97% sequence identity, after 16S rRNA  
 618 gene sequencing and rarefaction to 50,000 sequences per sample. (A) Changes in the observed  
 619 no. OTUs (richness) in Control (gold) and Disturbance (blue) mesocosms over the thermal press  
 620 (weeks 4-16). (B) Changes in richness in Control, Disturbance, and Disturbance + Immigration  
 621 (pink) mesocosms over the recovery period, weeks 20-45. The Disturbance + Immigration  
 622 mesocosms received a dispersal event at week 17. (C) Changes in evenness over weeks 4-16. (D)

623 Changes in evenness over weeks 20-45. Asterisks indicate significant differences by a Kruskal  
624 Wallis test (n.s = not significant; \*  $p < 0.1$ , \*\*  $p < 0.01$ , \*\*\*  $p < 0.001$ , with a Dunn correction for  
625 multiple comparisons in B and D).  
626

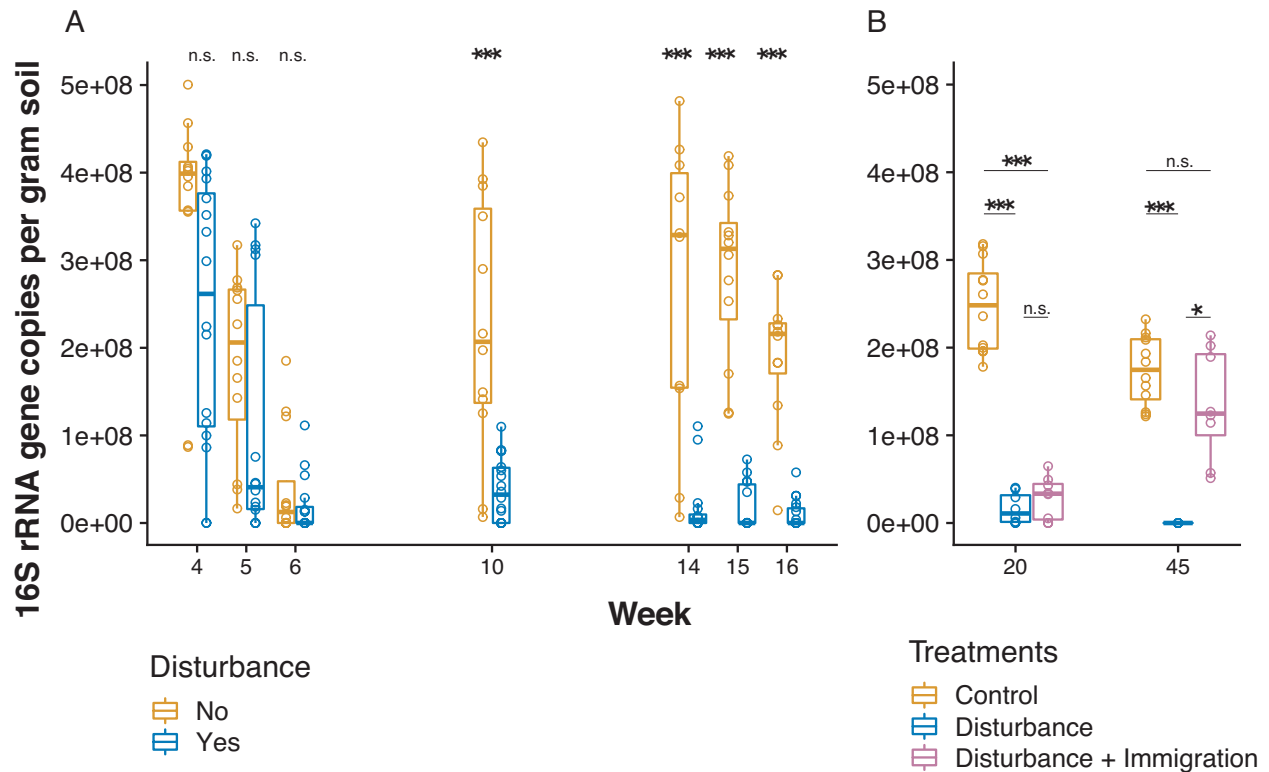

627

628

**Figure 3. Changes in community size over the disturbance experiment.** Community size

629

was estimated using qPCR of the 16S rRNA gene and standardized per gram of soil from which

630

nucleic acids were extracted. (A) Changes in the 16S rRNA gene copies in Control (gold) and

631

Disturbance (blue) mesocosms over the thermal press (weeks 4-16). (B) Changes in the 16S

632

rRNA gene copies in Control, Disturbance and Disturbance + Immigration (pink) mesocosms

633

over the recovery period, weeks 20-45. The Disturbance + Immigration mesocosms received a

634

dispersal event at week 17. Asterisks indicate significant differences by a Kruskal Wallis test

635

(n.s. = not significant, \*  $p < 0.1$ , \*\*  $p < 0.01$ , \*\*\*  $p < 0.001$ , with a Dunn correction for multiple

636

comparisons in B).

637



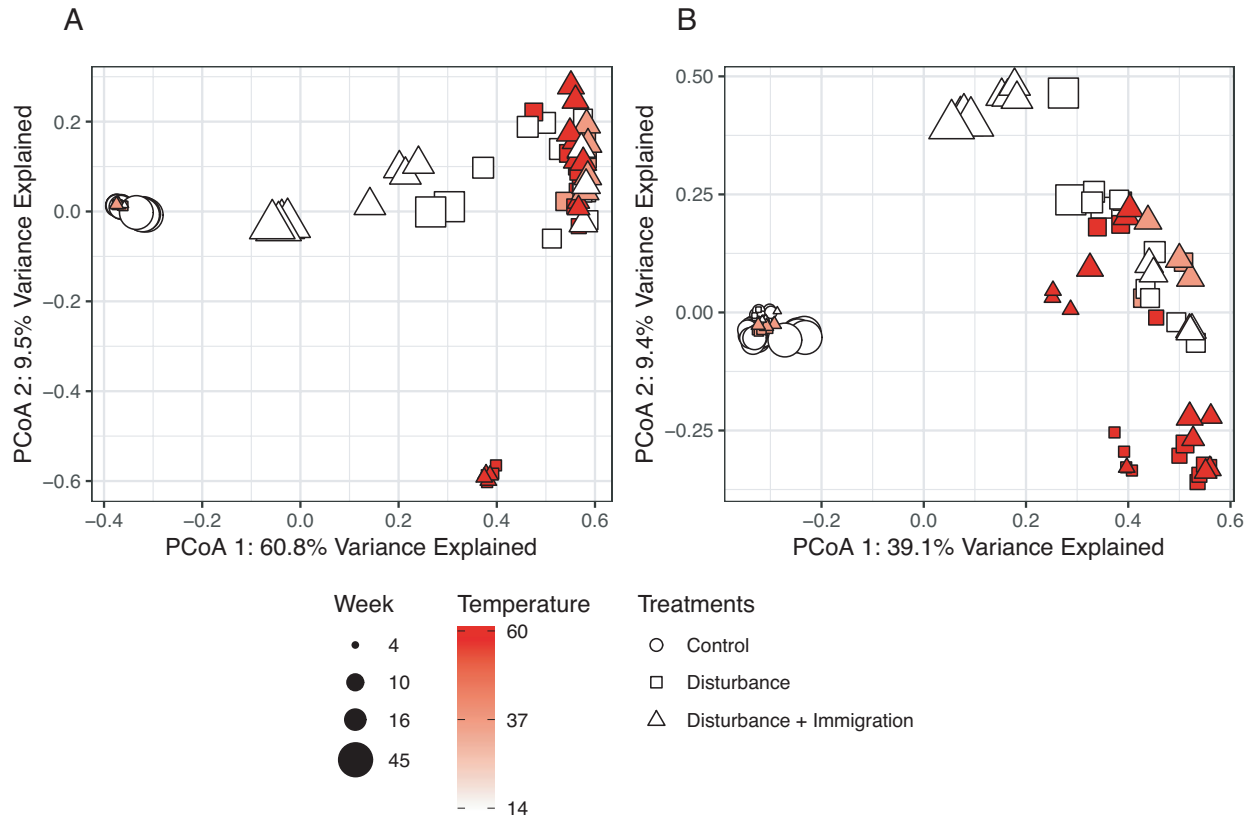

638

639 **Figure 4. Changes in beta diversity over the disturbance experiment.** Pairwise differences in

640 community structure was quantified using pairwise Bray-Curtis dissimilarity and then ordinated

641 using Principal Coordinates Analysis (PCoA). Time is shown by symbol size, and mesocosm

642 temperature is indicated by heat colors, with the brightest red indicating the warmest time point.

643 Control mesocosms are circles, Disturbance are squares, and Disturbance + Immigration are

644 triangles. (A) PCoA of the Total community, assessed using sequencing of the 16S rRNA gene.

645 (B) PCoA of the Active community, including only OTUs that had 16S rRNA:rRNA gene > 1.

646

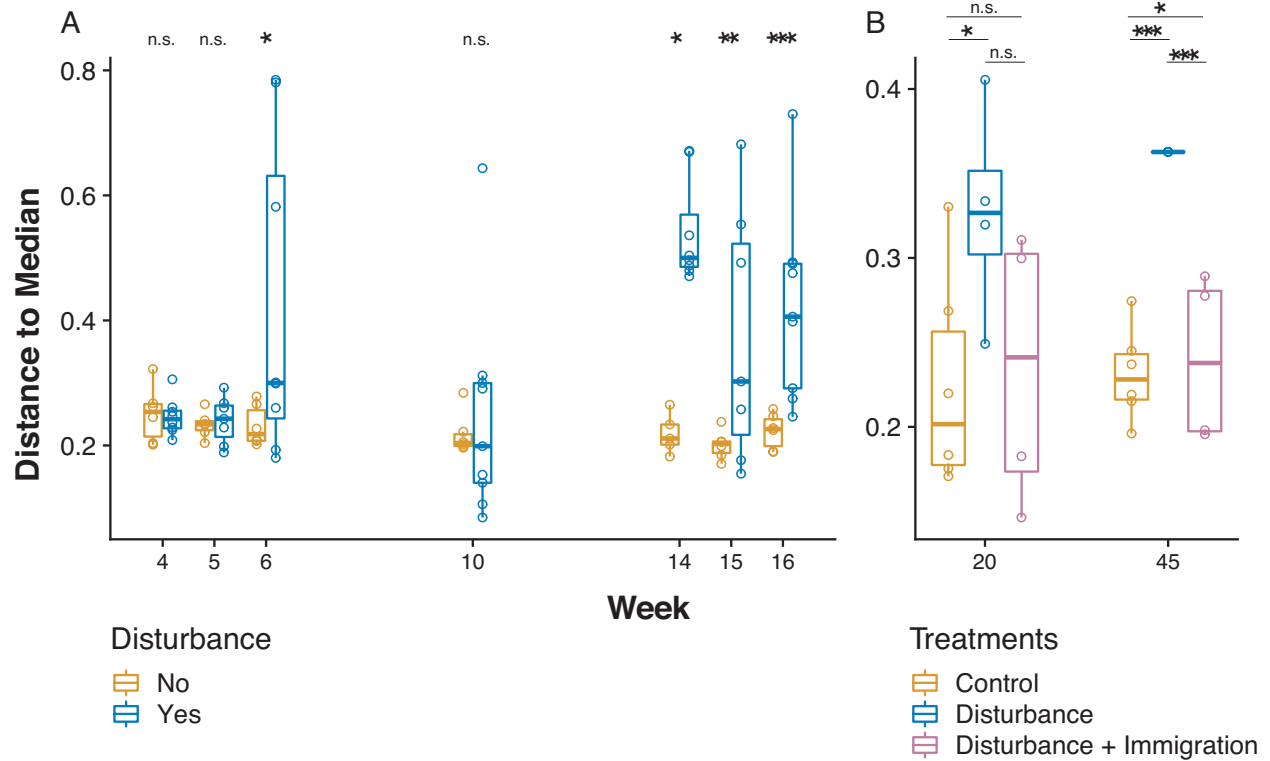

647

648 **Figure 5. Changes in beta dispersion over the disturbance experiment.** Beta dispersion, an

649 indicator of variability in community structure, was quantified using the distance to the median

650 in ordination space (Figure 4), which was constructed based on Bray-Curtis dissimilarity. (A)

651 Changes in beta dispersion in Control (gold) and Disturbance (blue) mesocosms over the thermal

652 press (weeks 4-16). (B) Changes in beta dispersion in Control, Disturbance, and Disturbance +

653 Immigration (pink) mesocosms over the recovery period, weeks 20-45. The Disturbance +

654 Immigration mesocosms received a dispersal event at week 17. Asterisks indicate significant

655 differences with a Tukey's Honestly Significant Difference post-hoc test (n.s. = not significant, \*

656  $p < 0.1$ , \*\*  $p < 0.01$ , \*\*\*  $p < 0.001$ ). Note differences in y-axis ranges between A and B.

657

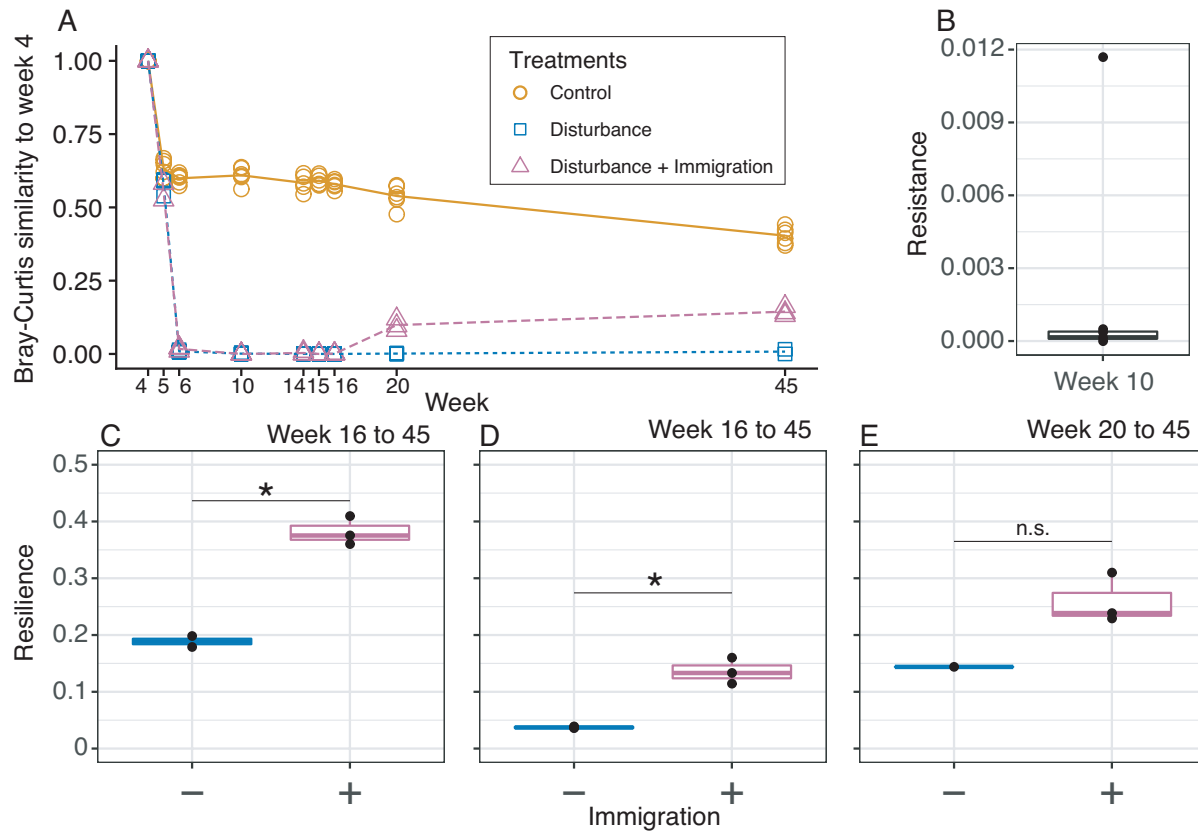

658

659 **Figure 6. Resistance and resilience of soil mesocosm communities to a thermal press. (A)**

660 Temporal series of community divergence from pre-disturbance community (week 4) in Control

661 (gold solid line), Disturbance (blue short dashed line), and Disturbance + Immigration (pink long

662 dashed line) to calculate resistance and resilience. (B) Resistance of disturbed mesocosms at

663 week 10, the time point of maximum community change after the thermal press begins. (C-E)

664 Resilience of disturbed mesocosms without (-) and with (+) immigration, calculated after the

665 thermal press is released (week 16) for the (C) full recovery to week 45, (D) initial recovery to

666 week 20, and also for (E) long-term recovery from weeks 20 to 45. Asterisks indicate significant

667 differences by a Kruskal Wallis test (n.s. = not significant, \*  $p < 0.1$ ).

668

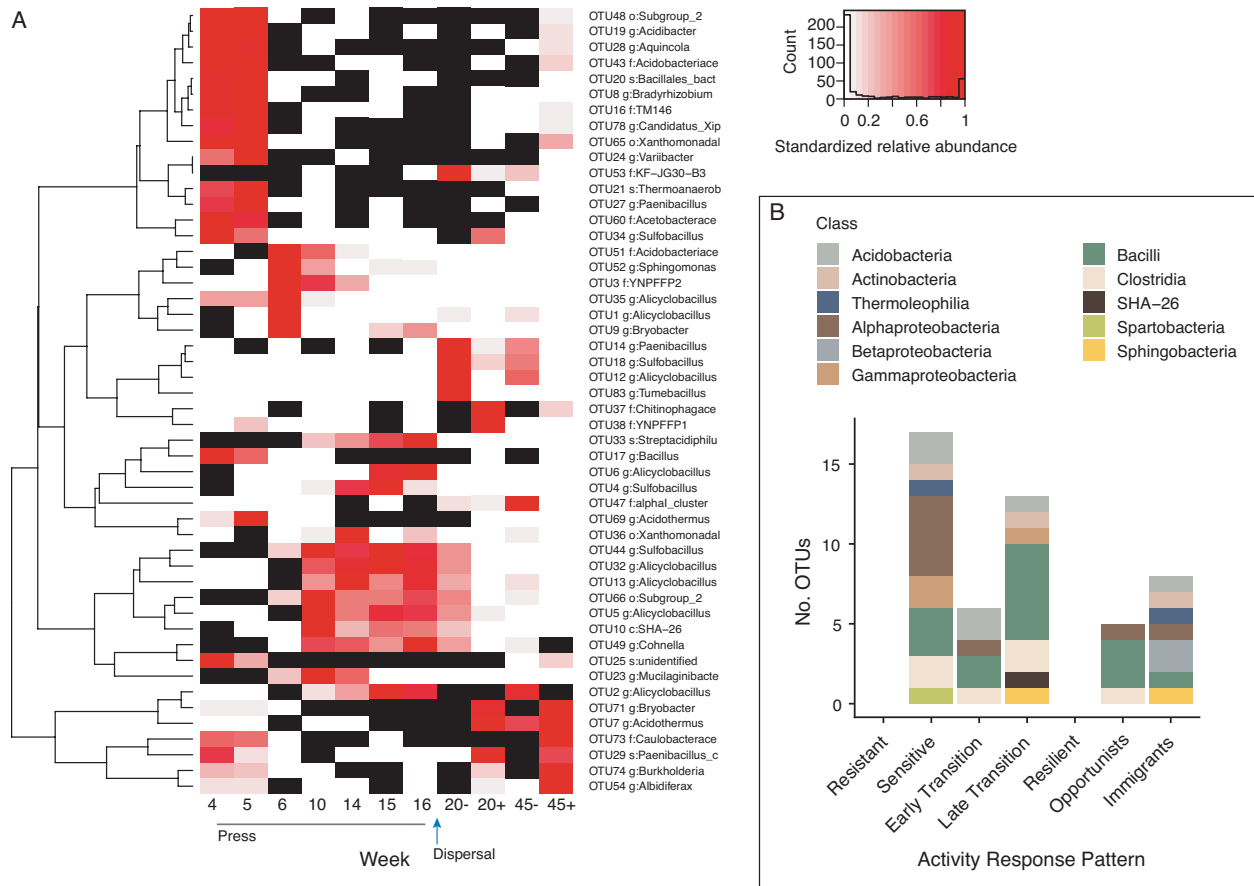

669

670 **Figure 7. The activity dynamics of the 50 most abundant taxa in response to the press**

671 **disturbance.** (A) Heatmap and dendrogram of abundant taxa reveal common patterns of

672 detection and activity. Black cells are taxa that were undetected (coded as NA) in the 16S rRNA

673 gene (DNA) community, and white cells are taxa that were detected in the DNA but had 16S

674 rRNA:rRNA gene < 1 (inactive, coded as 0). The heat gradient indicates each taxon's abundance

675 relative to its maximum observed in disturbance treated mesocosms during the experiment.

676 Immigration is indicated for weeks 20 and 45 by minus (no) and plus (yes) signs. (B) Summary

677 of activity response patterns to the disturbance of the top 50 taxa, including resistant, sensitive,

678 early and late transition, resilient, opportunist, and immigrant taxa.

679

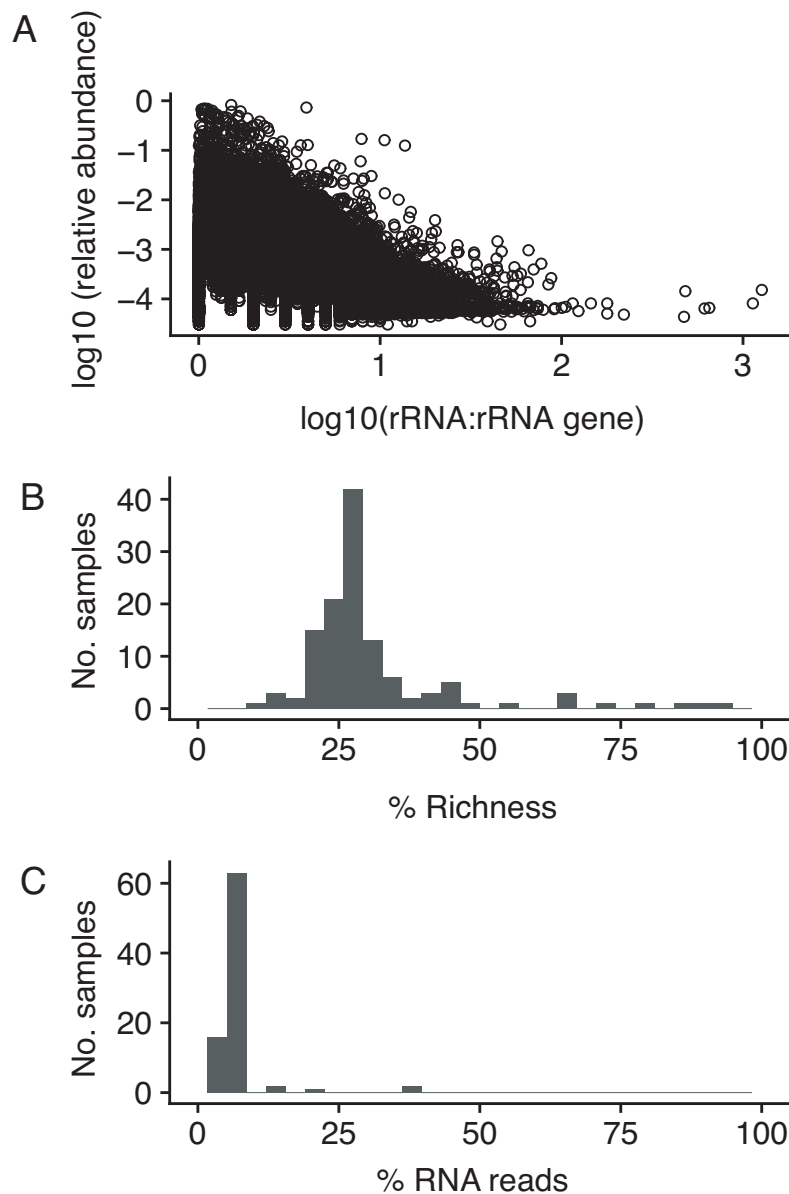

680

681 **Figure 8. Taxon activity and abundance relationships.** (A) Log10 relative abundance and  
 682 log10 rRNA:rRNA gene ratio were inversely correlated. Each point is a different OTU detected  
 683 in the dataset that had 16S rRNA:rRNA gene greater than or equal to 1. (B) Distribution of  
 684 percent sample richness (No. OTUs detected, inclusive of DNA and RNA datasets) that were  
 685 phantom taxa (16S rRNA detected but not 16S rRNA gene). (C) Distribution of percent RNA  
 686 reads attributed to phantom taxa.
